# Supplementary material for: Short-term exposure to fine particulate matter and its constituents may affect renal function via oxidative stress: A longitudinal panel study
Source: PubMed Central journal article supplement (PMC8976286; doi:10.1016/j.chemosphere.2022.133570), 2022-04

## Supplemental Material

### Short-term exposure to fine particulate matter and its constituents may affect renal function via oxidative stress: A longitudinal panel study

#### Table of contents

Table S1. Changes in superoxide dismutase (mean and 95% confidence intervals) with increase in [BUN blood urea nitrogen (mmol/L)] concentrations at previous visits ( $Y_{ij} \rightarrow M_{ij+1}$ ).

| $M_{ij+1}$           | Changes and 95% confidence | <i>p</i> -value |
|----------------------|----------------------------|-----------------|
| Superoxide dismutase | -0.55 (-1.66, 0.56)        | 0.37            |

#### Figure of contents

Figure S1. Directed acyclic graph for mediation analysis.  $PM_{2.5}^{ij}$  represents  $PM_{2.5}$  exposure for  $i^{\text{th}}$  subject prior to  $j^{\text{th}}$  visit;  $M^{ij}$  represents the potential bio-mediator levels for  $i^{\text{th}}$  subject prior to  $j^{\text{th}}$  visit;  $Y^{ij}$  represents the renal function indicators for  $i^{\text{th}}$  subject prior to  $j^{\text{th}}$  visit;  $C_1^{ij}$  represents exposure-outcome confounders;  $C_2^{ij}$  represents exposure-mediator confounders;  $C_3^{ij}$  represent mediator-outcome confounders. The dotted line indicates the time-varying confounding assumption.

Figure S2. Monthly averaged  $PM_{2.5}$  concentrations from September to December in Wuhan, China, 2018 to 2020.

Figure S3. Changes in blood urea nitrogen and blood urea nitrogen-to-serum creatinine (mean and 95% confidence intervals) with an interquartile range increment of 3-day averaged PM<sub>2.5</sub> concentrations in the two-pollutant models.

Figure S4. Changes (mean and 95% confidence intervals) in blood urea nitrogen associated with an interquartile range increase in 3-day average concentrations of PM<sub>2.5</sub>-bound constituents in the constituent-PM<sub>2.5</sub> joint models and the constituent-residual model. Abbreviations same as in Table 2. \*Estimated were statistically significant (p-value < 0.05).

Figure S1

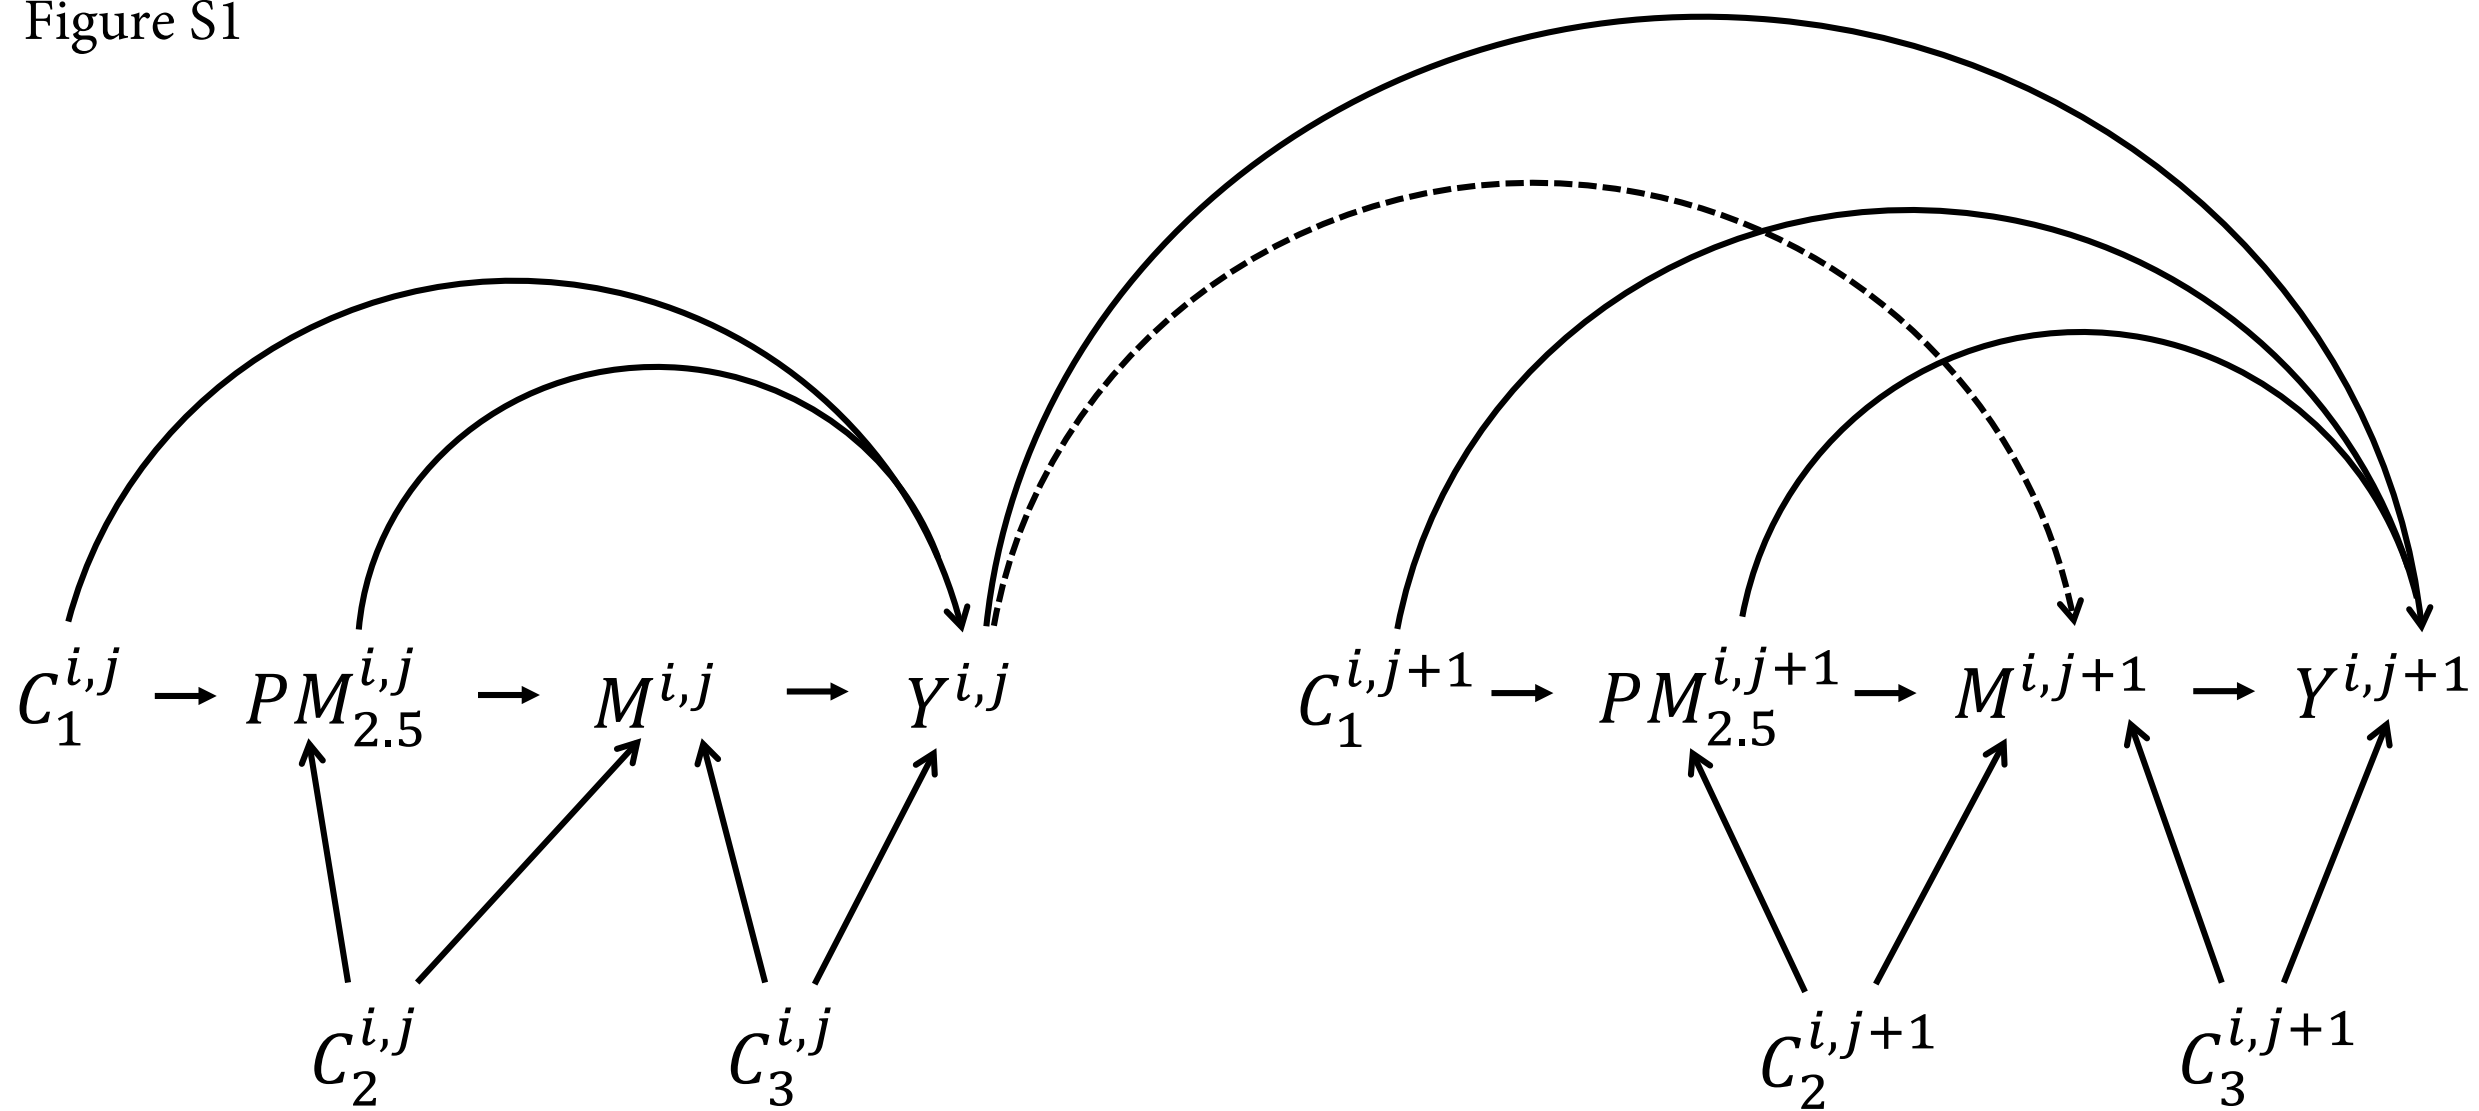

Figure S2

PM<sub>2.5</sub> concentrations from September to December in Wuhan, China, 2018 to 2020

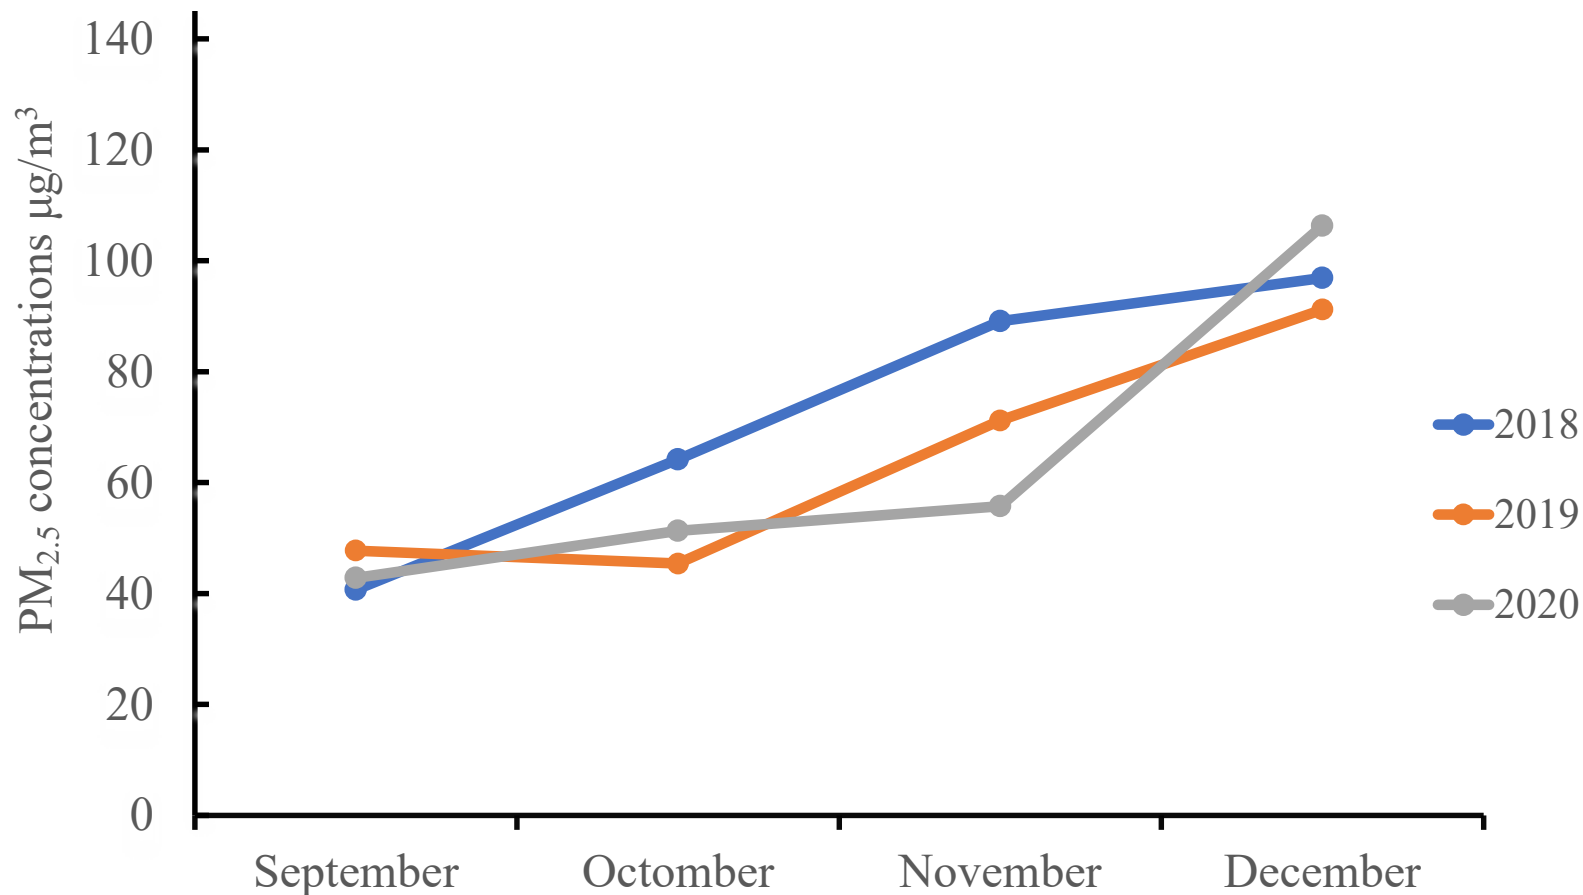

Figure S3

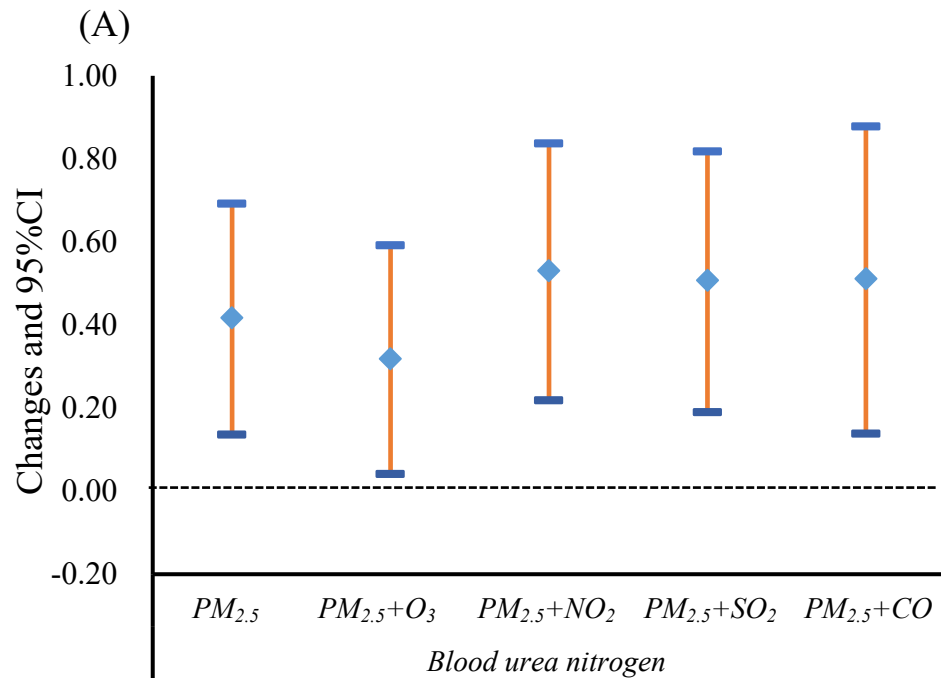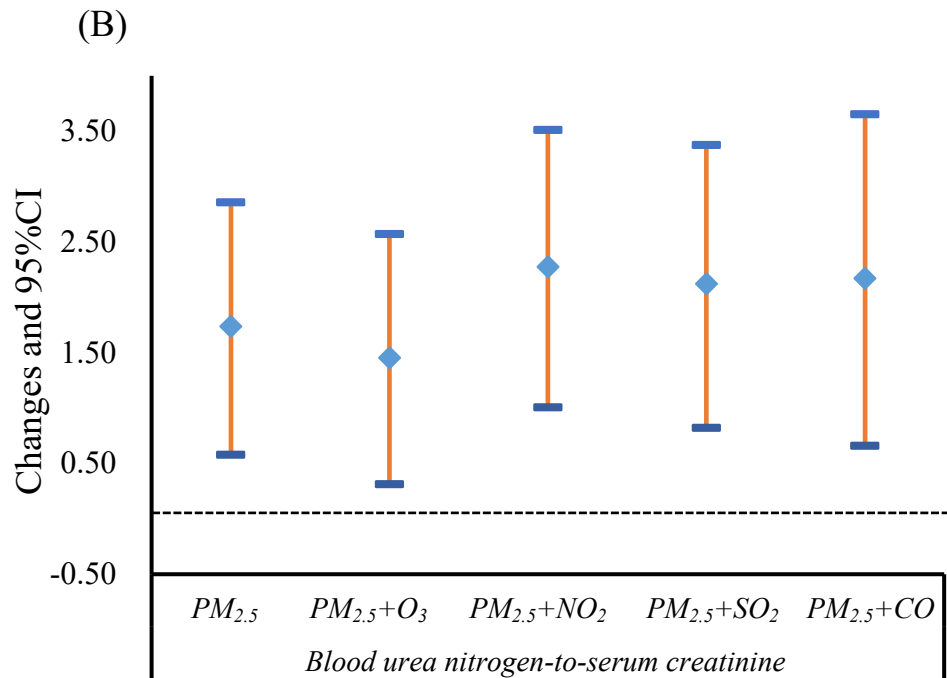

Figure S4

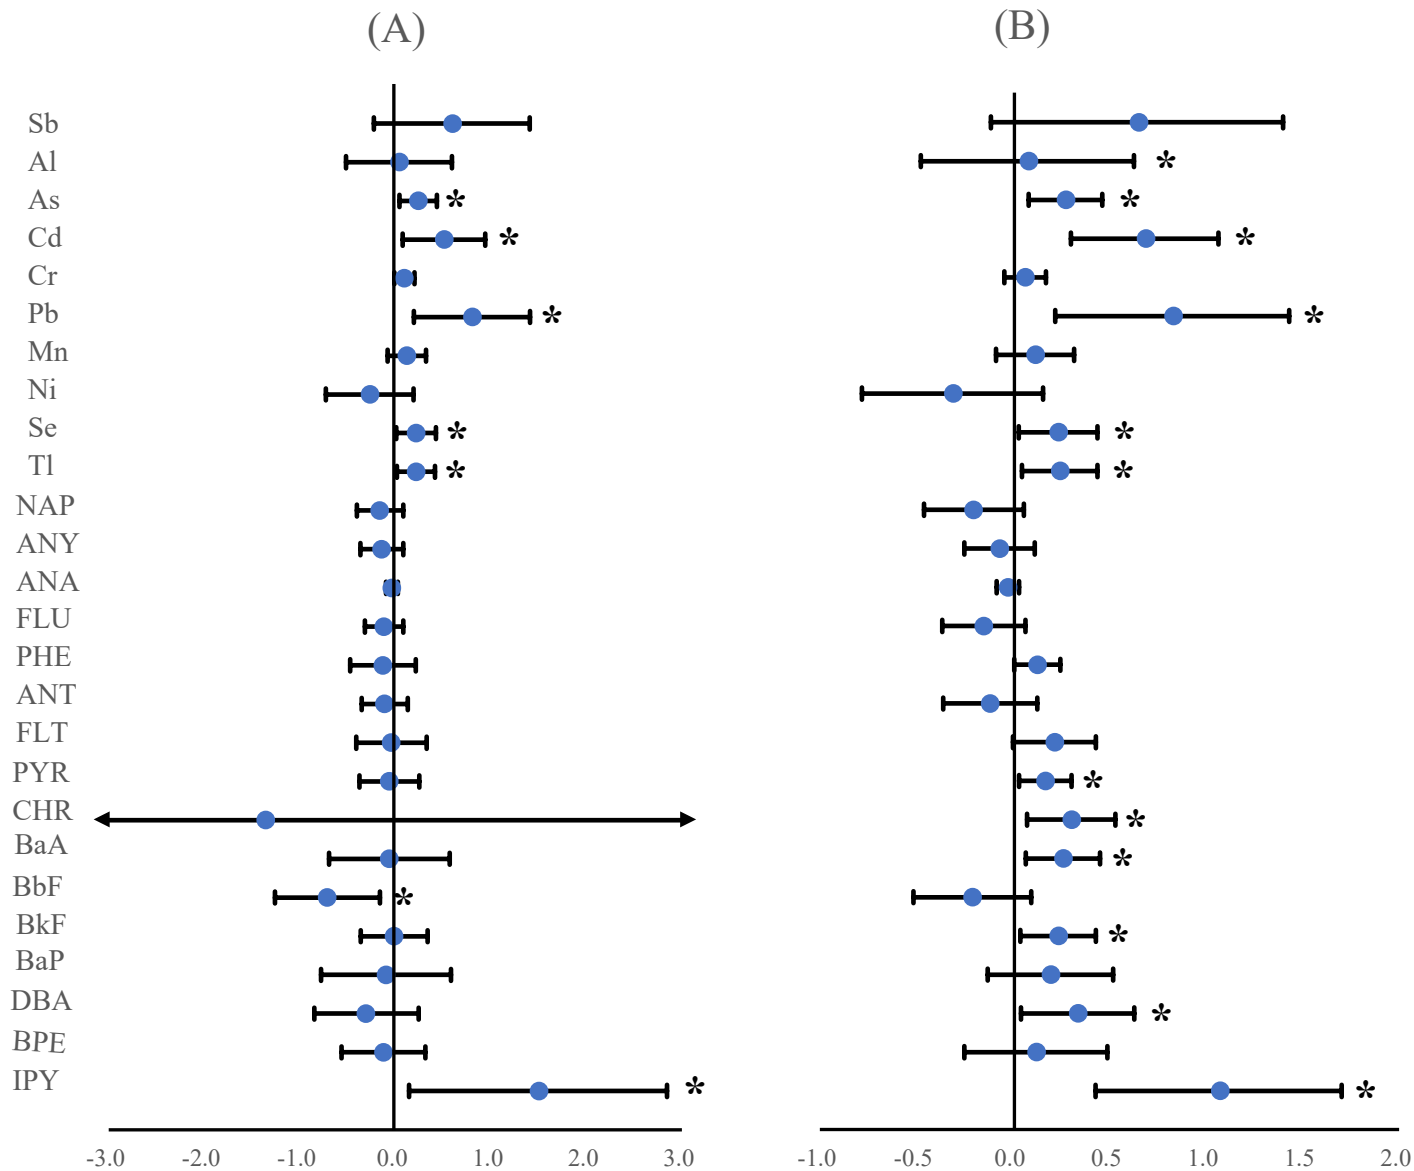

Supplement: mmc1.pdf [file mmc1.pdf]
